# Supplementary material for: Mechanistic insights into the dominant reaction route and catalyst deactivation in biogas reforming usingab initiomicrokinetic modeling
Source: Royal Society of Chemistry journal article supplement (doi:10.1039/d0cy02155e), 2021-01-01
Supplement: d0cy02155e1.pdf [file d0cy02155e1.pdf]

## Supporting Information

### Mechanistic Insights into Dominant Reaction Route and Catalyst Deactivation in Biogas Reforming using *ab initio* Microkinetic Modeling

Fatima Jalid<sup>1,2</sup>, M. Ali Haider<sup>1,§</sup>, Md. Imteyaz Alam<sup>1</sup>, Tuhin S. Khan<sup>3,§</sup>

<sup>1</sup>Renewable Energy and Chemicals Laboratory, Department of Chemical Engineering, Indian Institute of Technology Delhi, Hauz Khas, Delhi, 110016, India.

<sup>2</sup>Department of Chemical Engineering, National Institute of Technology Srinagar, Srinagar, Jammu and Kashmir, 190006, India

<sup>3</sup>Light Stock Processing Division, CSIR-Indian Institute of Petroleum, Dehradun, 24805, India

<sup>§</sup>Corresponding Authors Email: [haider@iitd.ac.in](mailto:haider@iitd.ac.in), [tuhins.khan@iip.res.in](mailto:tuhins.khan@iip.res.in)

Fax: +91-11-2658-2037; Tel: +91-11-26591016

#### SI-1 Reaction Scheme

The elementary reactions included in the MKM to understand the biogas reforming (BGR) on the terrace and stepped sites of transition metal catalysts are mentioned below. ‘\*t’ represents a free step site (111), ‘\*s’ represents a free step site (211), ‘\*h’ represents the hydrogen site and the subscript ‘(g)’ represents the gas phase species. The superscript ‘t’, ‘s’ and ‘h’ represents species adsorbed on terrace sites, step site and hydrogen site respectively. The following are the reaction steps studied for (111) sites:

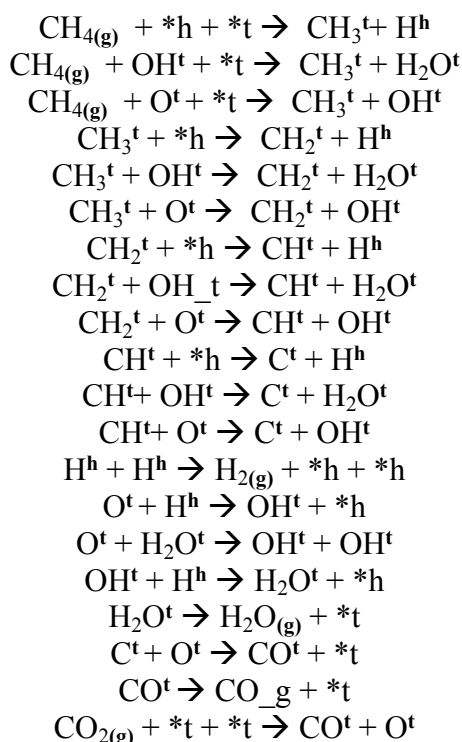

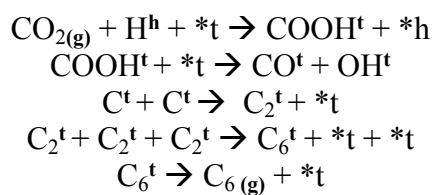

The following are the reaction steps studied for (211) sites:

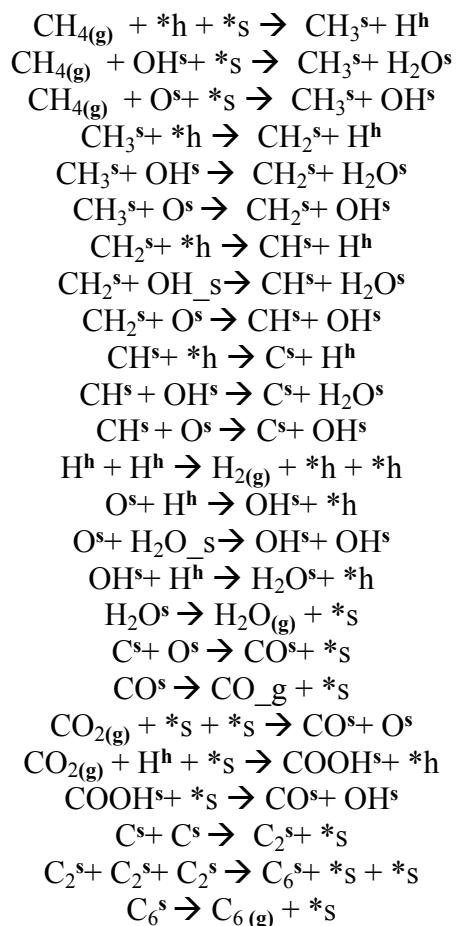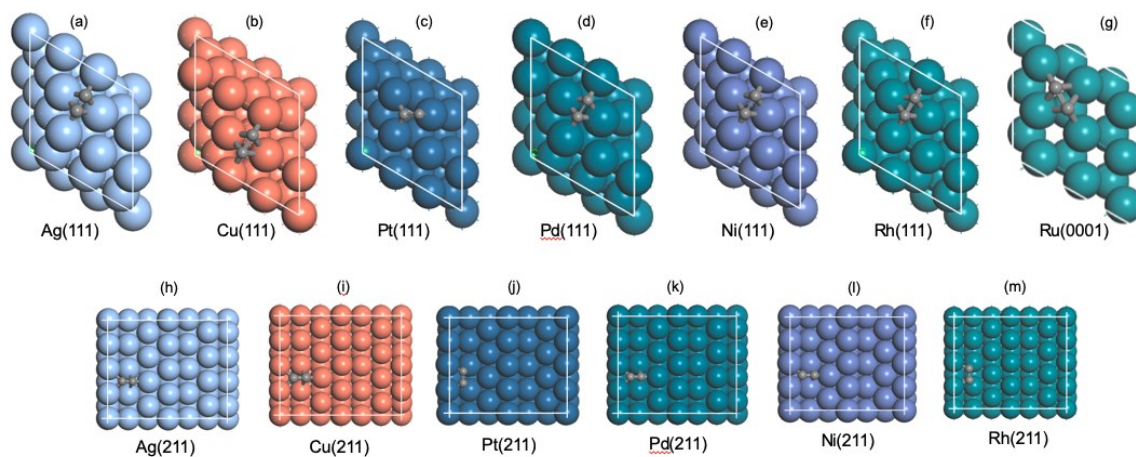

**Figure SI-1** Adsorbed Configuration of  $\text{C}_2$  on (111) and (211) facets of Ag, Cu, Pt, Pd, Ni and Rh

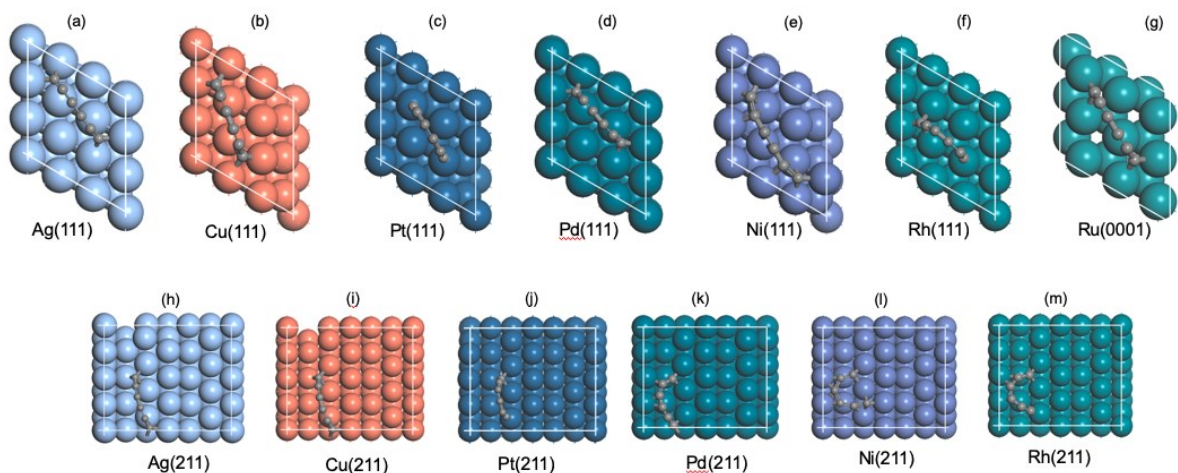

**Figure SI-2** Adsorbed Configuration of  $C_6$  on (111) and (211) facets of Ag, Cu, Pt, Pd, Ni and Rh

### SI-2 Entropy and Frequency of Gas Phase Species

The fixed entropy correction for gas phase species is given in Table SI-1.

**Table SI-1** Entropy of Gas Phase Species

| Gas Phase Species | Entropy (eV) |
|-------------------|--------------|
| $H_2$             | 0.00135      |
| $H_2O$            | 0.0018884    |
| $CH_4$            | 0.0018637    |
| $CO$              | 0.0019766    |
| $CO_2$            | 0.0021379    |
| $C_6$             | 0.0001       |

The zero-point energy of the gas phase species used in the MKM are given in Table SI-2.

**Table SI-2** ZPE of Gas Phase Species

| Gas Phase Species    | ZPE (eV)                                                               |
|----------------------|------------------------------------------------------------------------|
| $\text{H}_2$         | 0.54565                                                                |
| $\text{H}_2\text{O}$ | 0.43884, 0.1914, 0.45072                                               |
| $\text{CH}_4$        | 0.35004, 0.18408, 0.18408, 0.37308, 0.37308, 0.37272, 0.37272, 0.37272 |
| $\text{CO}$          | 0.2604                                                                 |
| $\text{CO}_2$        | 0.15996, 0.28188, 0.08004, 0.08004                                     |
| $\text{C}_6$         | 7.31736                                                                |

### SI-3 Reactivity of terrace sites for biogas reforming

The consumption rate of  $\text{H}_2$ , production rate of  $\text{H}_2\text{O}$  and coverage of the rest of species ( $\text{O}^*$ ) for MKM evaluated for BGR at terrace sites is shown in Figure SI-1, Figure SI-2 and Figure SI-3 respectively.

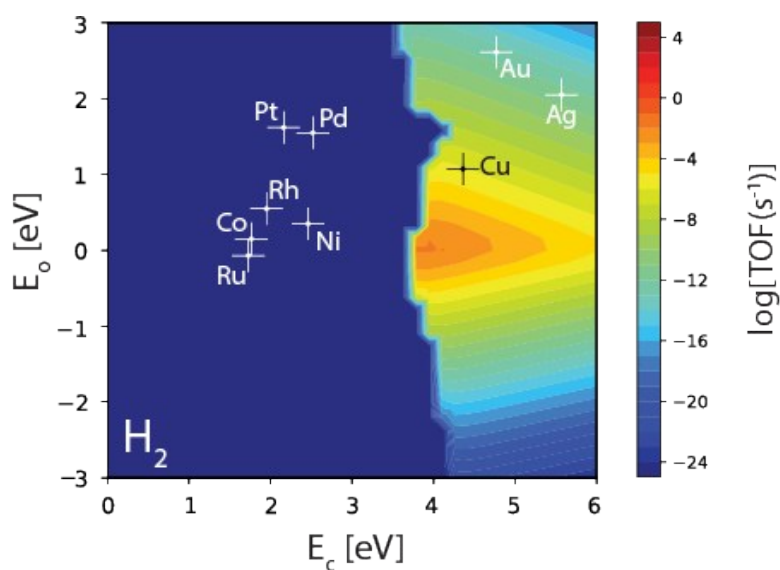

**Figure SI-3** Volcano plots showing reactant consumption rates of  $\text{H}_2$  in BGR over the (111) surfaces of transition metals. Error bar = 0.2 eV.

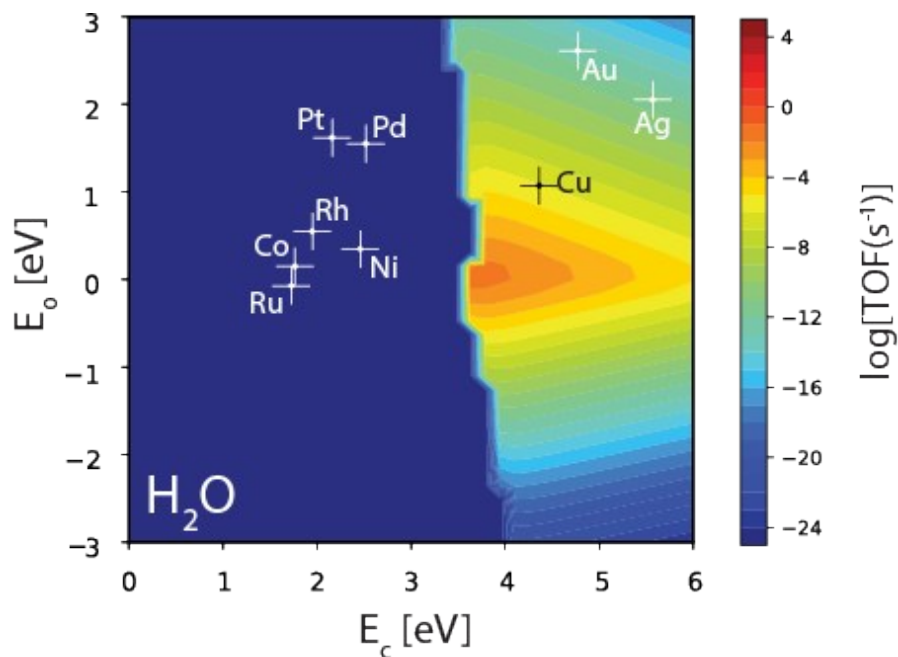

**Figure SI-4** Volcano plots showing product formation rates of  $\text{H}_2\text{O}$  in BGR over the (111) surfaces of transition metals. Error bar = 0.2 eV.

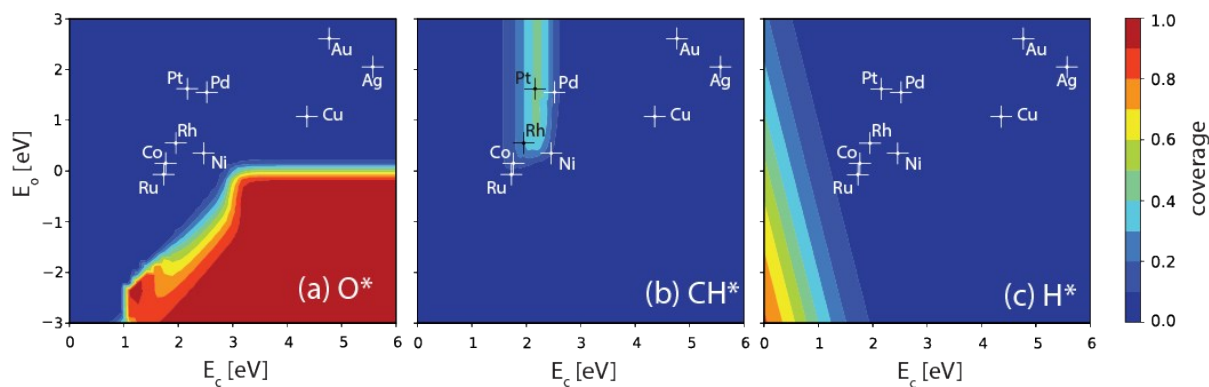

**Figure SI-5** Coverage plots showing coverage of (a)  $\text{O}^*$ , (b)  $\text{CH}^*$  and (c)  $\text{H}^*$  in BGR over the (111) surfaces of transition metals. Error bar = 0.2 eV.

#### SI-4 Reactivity of stepped sites for biogas reforming

The consumption rate of  $\text{H}_2$ , production rate of  $\text{H}_2\text{O}$  and coverage of the rest of species for MKM evaluated for BGR at stepped sites is shown in Figure SI-4 and Figure SI-5, respectively.

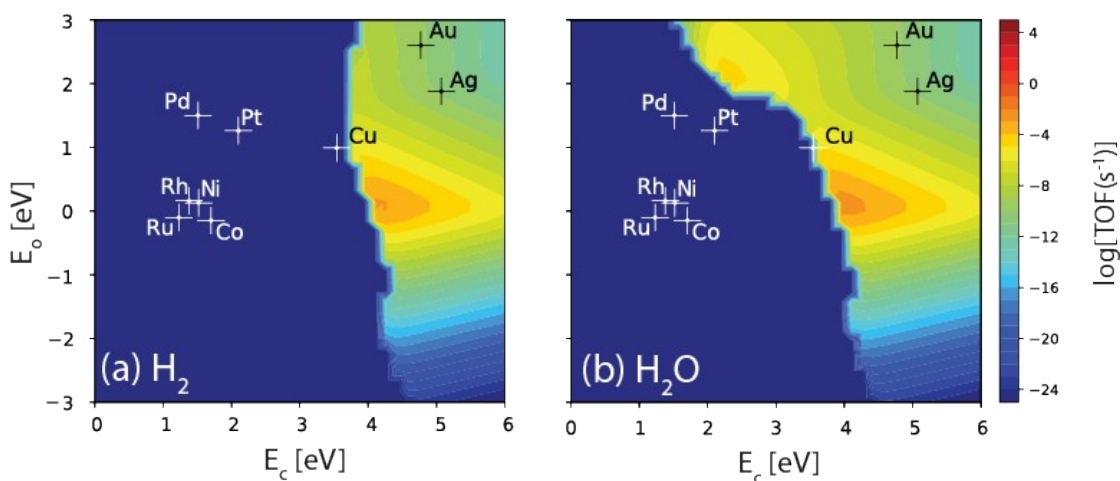

**Figure SI-6** Volcano plots showing reactant consumption rate of (a)  $\text{H}_2$  and product formation rates of (b)  $\text{H}_2\text{O}$  in BGR over the (211) surfaces of transition metals. Error bar = 0.2 eV.

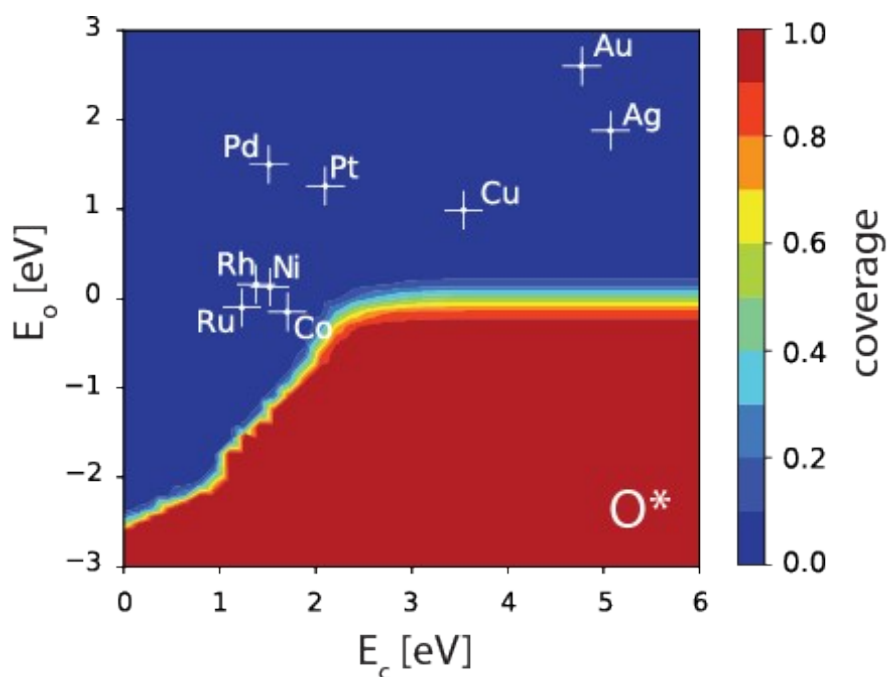

**Figure SI-7** Coverage plots showing coverage of  $\text{O}^*$  in BGR over the (211) surfaces of transition metals. Error bar = 0.2 eV.

### SI-5 Reaction Energetics

The formation energies of the species used in the model are listed in Table SI-3. The formation energies of all the species are referenced with respect to methane, hydrogen, and water; for C, H and O atom respectively. The energies have been obtained from previous literature<sup>1-10</sup> and

calculated in this work. The computational details of the reference articles is given in Table SI-

4.

**Table SI-3** Formation energies of the species used in the MKM. Formation energies are references to CH<sub>4</sub>, H<sub>2</sub>O and H<sub>2</sub>.

| Species          | Facet | Surface | Formation Energy (eV) |
|------------------|-------|---------|-----------------------|
| CO <sub>2</sub>  | gas   | None    | 2.47                  |
| CO               | gas   | None    | 2.77                  |
| CH <sub>4</sub>  | gas   | None    | 0                     |
| H <sub>2</sub> O | gas   | None    | 0                     |
| H <sub>2</sub>   | gas   | None    | 0                     |
| C <sub>6</sub>   | gas   | None    | 4.66                  |
| C                | 111   | Ag      | 5.57                  |
| C                | 111   | Au      | 4.77                  |
| C                | 111   | Co      | 1.76                  |
| C                | 111   | Cu      | 4.36                  |
| C                | 111   | Ni      | 2.46                  |
| C                | 111   | Pd      | 2.52                  |
| C                | 111   | Pt      | 2.16                  |
| C                | 111   | Rh      | 1.95                  |
| C                | 111   | Ru      | 1.73                  |
| C-C              | 111   | Ag      | 10.97                 |
| C-C              | 111   | Au      | 9.69                  |
| C-C              | 111   | Cu      | 9.03                  |
| C-C              | 111   | Ni      | 5.99                  |
| C-C              | 111   | Pd      | 6.09                  |
| C-C              | 111   | Pt      | 5.51                  |
| C-C              | 111   | Rh      | 5.18                  |
| C-H              | 111   | Ag      | 6.53                  |
| C-H              | 111   | Au      | 5.81                  |
| C-H              | 111   | Co      | 2.81                  |
| C-H              | 111   | Cu      | 5.06                  |
| C-H              | 111   | Ni      | 2.87                  |
| C-H              | 111   | Pd      | 3.12                  |
| C-H              | 111   | Pt      | 3.10                  |
| C-H              | 111   | Rh      | 2.56                  |
| C-H              | 111   | Ru      | 2.53                  |
| C-O              | 111   | Ag      | 8.15                  |
| C-O              | 111   | Au      | 7.96                  |
| C-O              | 111   | Cu      | 6.40                  |

|                 |     |    |       |
|-----------------|-----|----|-------|
| C-O             | 111 | Ni | 4.30  |
| C-O             | 111 | Pd | 5.31  |
| C-O             | 111 | Pt | 5.08  |
| C-O             | 111 | Rh | 4.05  |
| C <sub>2</sub>  | 111 | Ag | 6.71  |
| C <sub>2</sub>  | 111 | Cu | 5.72  |
| C <sub>2</sub>  | 111 | Ni | 4.55  |
| C <sub>2</sub>  | 111 | Pd | 5.28  |
| C <sub>2</sub>  | 111 | Pt | 5.55  |
| C <sub>2</sub>  | 111 | Rh | 4.45  |
| C <sub>2</sub>  | 111 | Ru | 3.95  |
| C <sub>6</sub>  | 111 | Cu | 16.84 |
| C <sub>6</sub>  | 111 | Ni | 15.18 |
| C <sub>6</sub>  | 111 | Pd | 15.51 |
| C <sub>6</sub>  | 111 | Pt | 16.16 |
| C <sub>6</sub>  | 111 | Rh | 15.96 |
| C <sub>6</sub>  | 111 | Ru | 14.74 |
| CH              | 111 | Ag | 3.96  |
| CH              | 111 | Au | 3.23  |
| CH              | 111 | Co | 1.51  |
| CH              | 111 | Cu | 2.85  |
| CH              | 111 | Ni | 1.48  |
| CH              | 111 | Pd | 1.74  |
| CH              | 111 | Pt | 1.23  |
| CH              | 111 | Rh | 1.21  |
| CH              | 111 | Ru | 1.14  |
| CH <sub>2</sub> | 111 | Ag | 3.04  |
| CH <sub>2</sub> | 111 | Au | 2.65  |
| CH <sub>2</sub> | 111 | Co | 1.45  |
| CH <sub>2</sub> | 111 | Cu | 2.35  |
| CH <sub>2</sub> | 111 | Ni | 1.44  |
| CH <sub>2</sub> | 111 | Pd | 1.64  |
| CH <sub>2</sub> | 111 | Pt | 1.21  |
| CH <sub>2</sub> | 111 | Rh | 1.33  |
| CH <sub>2</sub> | 111 | Ru | 1.17  |
| CH <sub>3</sub> | 111 | Ag | 1.60  |
| CH <sub>3</sub> | 111 | Au | 1.35  |
| CH <sub>3</sub> | 111 | Co | 0.89  |
| CH <sub>3</sub> | 111 | Cu | 1.30  |
| CH <sub>3</sub> | 111 | Ni | 0.93  |
| CH <sub>3</sub> | 111 | Pd | 0.92  |
| CH <sub>3</sub> | 111 | Pt | 0.55  |



|                 |     |    |       |
|-----------------|-----|----|-------|
| CH <sub>3</sub> | 111 | Rh | 0.84  |
| CH <sub>3</sub> | 111 | Ru | 0.73  |
| CO              | 111 | Ag | 2.99  |
| CO              | 111 | Au | 3.04  |
| CO              | 111 | Cu | 2.58  |
| CO              | 111 | Ni | 1.63  |
| CO              | 111 | Pd | 1.55  |
| CO              | 111 | Pt | 1.70  |
| CO              | 111 | Rh | 1.34  |
| CO              | 111 | Ru | 1.30  |
| CO-OH           | 111 | Ag | 4.98  |
| CO-OH           | 111 | Au | 5.59  |
| CO-OH           | 111 | Cu | 4.36  |
| CO-OH           | 111 | Ni | 3.51  |
| CO-OH           | 111 | Pd | 4.04  |
| CO-OH           | 111 | Pt | 4.18  |
| CO-OH           | 111 | Rh | 3.47  |
| CO-OH           | 111 | Ru | 3.24  |
| COO-H           | 111 | Cu | 3.79  |
| COO-H           | 111 | Pd | 2.92  |
| COO-H           | 111 | Pt | 3.05  |
| COO-H           | 111 | Rh | 3.14  |
| COOH            | 111 | Ag | 3.13  |
| COOH            | 111 | Au | 3.01  |
| COOH            | 111 | Cu | 2.82  |
| COOH            | 111 | Ni | 2.25  |
| COOH            | 111 | Pd | 2.39  |
| COOH            | 111 | Pt | 1.41  |
| COOH            | 111 | Rh | 1.23  |
| H               | 111 | Ag | 0.24  |
| H               | 111 | Au | 0.17  |
| H               | 111 | Cu | -0.09 |
| H               | 111 | Ni | -0.39 |
| H               | 111 | Pd | -0.40 |
| H               | 111 | Pt | -0.35 |
| H               | 111 | Rh | -0.32 |
| H               | 111 | Ru | -0.44 |
| H-CH            | 111 | Ag | 4.90  |
| H-CH            | 111 | Au | 4.26  |
| H-CH            | 111 | Co | 1.73  |
| H-CH            | 111 | Cu | 3.52  |
| H-CH            | 111 | Ni | 1.78  |

|                   |     |    |       |
|-------------------|-----|----|-------|
| H-CH              | 111 | Pd | 2.24  |
| H-CH              | 111 | Pt | 1.80  |
| H-CH              | 111 | Rh | 1.40  |
| H-CH              | 111 | Ru | 1.39  |
| H-CH <sub>2</sub> | 111 | Ag | 3.99  |
| H-CH <sub>2</sub> | 111 | Au | 3.45  |
| H-CH <sub>2</sub> | 111 | Co | 1.65  |
| H-CH <sub>2</sub> | 111 | Cu | 2.87  |
| H-CH <sub>2</sub> | 111 | Ni | 1.73  |
| H-CH <sub>2</sub> | 111 | Pd | 1.95  |
| H-CH <sub>2</sub> | 111 | Pt | 1.53  |
| H-CH <sub>2</sub> | 111 | Rh | 1.44  |
| H-CH <sub>2</sub> | 111 | Ru | 1.43  |
| H-CH <sub>3</sub> | 111 | Ag | 2.49  |
| H-CH <sub>3</sub> | 111 | Au | 2.23  |
| H-CH <sub>3</sub> | 111 | Co | 1.43  |
| H-CH <sub>3</sub> | 111 | Cu | 1.94  |
| H-CH <sub>3</sub> | 111 | Ni | 1.27  |
| H-CH <sub>3</sub> | 111 | Pd | 1.13  |
| H-CH <sub>3</sub> | 111 | Pt | 1.06  |
| H-CH <sub>3</sub> | 111 | Rh | 1.08  |
| H-CH <sub>3</sub> | 111 | Ru | 1.06  |
| H-H               | 111 | Au | 1.15  |
| H-H               | 111 | Cu | 0.78  |
| H-H               | 111 | Pd | 0.12  |
| H-H               | 111 | Pt | 0.19  |
| H-OH              | 111 | Ag | 1.78  |
| H-OH              | 111 | Au | 2.00  |
| H-OH              | 111 | Co | 1.03  |
| H-OH              | 111 | Cu | 1.30  |
| H-OH              | 111 | Ni | 0.91  |
| H-OH              | 111 | Pd | 1.18  |
| H-OH              | 111 | Pt | 0.85  |
| H-OH              | 111 | Rh | 0.85  |
| H-OH              | 111 | Ru | 0.74  |
| H <sub>2</sub> O  | 111 | Ag | -0.04 |
| H <sub>2</sub> O  | 111 | Au | -0.03 |
| H <sub>2</sub> O  | 111 | Co | -0.05 |
| H <sub>2</sub> O  | 111 | Cu | -0.04 |
| H <sub>2</sub> O  | 111 | Ni | -0.05 |
| H <sub>2</sub> O  | 111 | Pd | -0.08 |
| H <sub>2</sub> O  | 111 | Pt | -0.05 |

|                  |     |    |       |
|------------------|-----|----|-------|
| H <sub>2</sub> O | 111 | Rh | -0.11 |
| H <sub>2</sub> O | 111 | Ru | -0.21 |
| O                | 111 | Ag | 2.05  |
| O                | 111 | Au | 2.61  |
| O                | 111 | Co | 0.15  |
| O                | 111 | Cu | 1.07  |
| O                | 111 | Ni | 0.35  |
| O                | 111 | Pd | 1.55  |
| O                | 111 | Pt | 1.62  |
| O                | 111 | Rh | 0.55  |
| O                | 111 | Ru | -0.07 |
| O-CO             | 111 | Ag | 5.05  |
| O-CO             | 111 | Au | 5.74  |
| O-CO             | 111 | Cu | 4.18  |
| O-CO             | 111 | Ni | 3.25  |
| O-CO             | 111 | Pd | 4.20  |
| O-CO             | 111 | Pt | 4.04  |
| O-CO             | 111 | Rh | 3.10  |
| O-CO             | 111 | Ru | 2.53  |
| O-H              | 111 | Ag | 3.09  |
| O-H              | 111 | Au | 3.56  |
| O-H              | 111 | Co | 1.02  |
| O-H              | 111 | Cu | 2.03  |
| O-H              | 111 | Ni | 1.18  |
| O-H              | 111 | Pd | 2.12  |
| O-H              | 111 | Pt | 2.12  |
| O-H              | 111 | Rh | 1.52  |
| O-H              | 111 | Ru | 1.31  |
| OH               | 111 | Ag | 0.67  |
| OH               | 111 | Au | 1.39  |
| OH               | 111 | Co | 0.05  |
| OH               | 111 | Cu | 0.30  |
| OH               | 111 | Ni | 0.20  |
| OH               | 111 | Pd | 0.94  |
| OH               | 111 | Pt | 0.96  |
| OH               | 111 | Rh | 0.43  |
| OH               | 111 | Ru | 0.19  |
| C                | 211 | Ag | 5.07  |
| C                | 211 | Au | 4.77  |
| C                | 211 | Co | 1.70  |
| C                | 211 | Cu | 3.54  |
| C                | 211 | Ni | 1.52  |

|                |     |    |       |
|----------------|-----|----|-------|
| C              | 211 | Pd | 1.51  |
| C              | 211 | Pt | 2.10  |
| C              | 211 | Rh | 1.38  |
| C              | 211 | Ru | 1.23  |
| C-C            | 211 | Ag | 11.02 |
| C-C            | 211 | Au | 10.36 |
| C-C            | 211 | Co | 5.07  |
| C-C            | 211 | Cu | 8.22  |
| C-C            | 211 | Pt | 6.03  |
| C-C            | 211 | Rh | 4.51  |
| C-C            | 211 | Ru | 4.37  |
| C-H            | 211 | Cu | 4.31  |
| C-H            | 211 | Pd | 2.25  |
| C-H            | 211 | Pt | 3.06  |
| C-H            | 211 | Rh | 1.97  |
| C-H            | 211 | Ru | 1.74  |
| C-HO           | 211 | Ag | 5.92  |
| C-HO           | 211 | Cu | 4.15  |
| C-HO           | 211 | Pd | 2.73  |
| C-HO           | 211 | Pt | 3.26  |
| C-HO           | 211 | Rh | 2.01  |
| C-HOH          | 211 | Ag | 5.40  |
| C-HOH          | 211 | Cu | 4.03  |
| C-HOH          | 211 | Pd | 2.29  |
| C-HOH          | 211 | Pt | 2.83  |
| C-HOH          | 211 | Rh | 2.08  |
| C-O            | 211 | Ag | 8.07  |
| C-O            | 211 | Au | 8.18  |
| C-O            | 211 | Co | 3.19  |
| C-O            | 211 | Ni | 3.43  |
| C-O            | 211 | Pd | 4.63  |
| C-O            | 211 | Pt | 4.11  |
| C-O            | 211 | Rh | 3.03  |
| C-O            | 211 | Ru | 2.80  |
| C <sub>2</sub> | 211 | Ag | 5.8   |
| C <sub>2</sub> | 211 | Cu | 4.44  |
| C <sub>2</sub> | 211 | Ni | 3.57  |
| C <sub>2</sub> | 211 | Pd | 4.03  |
| C <sub>2</sub> | 211 | Rh | 4.23  |
| C <sub>6</sub> | 211 | Ag | 16.63 |
| C <sub>6</sub> | 211 | Cu | 15.28 |
| C <sub>6</sub> | 211 | Ni | 14.13 |

|                 |     |    |       |
|-----------------|-----|----|-------|
| C <sub>6</sub>  | 211 | Pd | 13.44 |
| C <sub>6</sub>  | 211 | Pt | 14.28 |
| C <sub>6</sub>  | 211 | Rh | 12.22 |
| CH              | 211 | Ag | 3.96  |
| CH              | 211 | Au | 3.43  |
| CH              | 211 | Co | 1.16  |
| CH              | 211 | Cu | 2.70  |
| CH              | 211 | Ni | 1.22  |
| CH              | 211 | Pd | 1.57  |
| CH              | 211 | Pt | 1.19  |
| CH              | 211 | Rh | 1.01  |
| CH              | 211 | Ru | 0.71  |
| CH <sub>2</sub> | 211 | Ag | 2.87  |
| CH <sub>2</sub> | 211 | Au | 2.23  |
| CH <sub>2</sub> | 211 | Co | 0.79  |
| CH <sub>2</sub> | 211 | Cu | 2.22  |
| CH <sub>2</sub> | 211 | Ni | 1.14  |
| CH <sub>2</sub> | 211 | Pd | 1.28  |
| CH <sub>2</sub> | 211 | Pt | 0.76  |
| CH <sub>2</sub> | 211 | Rh | 0.76  |
| CH <sub>2</sub> | 211 | Ru | 0.69  |
| CH <sub>3</sub> | 211 | Ag | 1.39  |
| CH <sub>3</sub> | 211 | Au | 1.10  |
| CH <sub>3</sub> | 211 | Co | 0.04  |
| CH <sub>3</sub> | 211 | Cu | 0.97  |
| CH <sub>3</sub> | 211 | Ni | 0.39  |
| CH <sub>3</sub> | 211 | Pd | 0.79  |
| CH <sub>3</sub> | 211 | Pt | 0.46  |
| CH <sub>3</sub> | 211 | Rh | 0.36  |
| CH <sub>3</sub> | 211 | Ru | 0.06  |
| CO              | 211 | Ag | 2.87  |
| CO              | 211 | Au | 2.57  |
| CO              | 211 | Co | 1.40  |
| CO              | 211 | Cu | 2.28  |
| CO              | 211 | Ni | 1.25  |
| CO              | 211 | Pd | 1.22  |
| CO              | 211 | Pt | 1.11  |
| CO              | 211 | Rh | 1.07  |
| CO              | 211 | Ru | 0.98  |
| CO-OH           | 211 | Ag | 3.75  |
| CO-OH           | 211 | Au | 4.14  |
| CO-OH           | 211 | Cu | 2.97  |

|                   |     |    |       |
|-------------------|-----|----|-------|
| CO-OH             | 211 | Pd | 3.10  |
| CO-OH             | 211 | Pt | 2.80  |
| CO-OH             | 211 | Rh | 2.40  |
| CO-OH             | 211 | Ru | 2.27  |
| COO-H             | 211 | Ag | 4.36  |
| COO-H             | 211 | Cu | 3.88  |
| COO-H             | 211 | Pd | 2.85  |
| COO-H             | 211 | Pt | 2.62  |
| COO-H             | 211 | Rh | 2.60  |
| COOH              | 211 | Ag | 3.05  |
| COOH              | 211 | Cu | 2.70  |
| COOH              | 211 | Pd | 2.17  |
| COOH              | 211 | Pt | 1.94  |
| COOH              | 211 | Rh | 1.59  |
| H                 | 211 | Ag | 0.24  |
| H                 | 211 | Au | 0.17  |
| H                 | 211 | Cu | -0.09 |
| H                 | 211 | Ni | -0.39 |
| H                 | 211 | Pd | -0.40 |
| H                 | 211 | Pt | -0.35 |
| H                 | 211 | Rh | -0.32 |
| H                 | 211 | Ru | -0.44 |
| H-CH              | 211 | Ag | 4.74  |
| H-CH              | 211 | Au | 4.58  |
| H-CH              | 211 | Co | 1.78  |
| H-CH              | 211 | Cu | 3.27  |
| H-CH              | 211 | Ni | 1.93  |
| H-CH              | 211 | Pd | 2.05  |
| H-CH              | 211 | Pt | 2.35  |
| H-CH              | 211 | Rh | 1.54  |
| H-CH              | 211 | Ru | 1.07  |
| H-CH <sub>2</sub> | 211 | Ag | 3.52  |
| H-CH <sub>2</sub> | 211 | Au | 2.81  |
| H-CH <sub>2</sub> | 211 | Co | 0.99  |
| H-CH <sub>2</sub> | 211 | Cu | 2.50  |
| H-CH <sub>2</sub> | 211 | Ni | 1.41  |
| H-CH <sub>2</sub> | 211 | Pd | 1.53  |
| H-CH <sub>2</sub> | 211 | Pt | 0.94  |
| H-CH <sub>2</sub> | 211 | Rh | 0.79  |
| H-CH <sub>2</sub> | 211 | Ru | 0.68  |
| H-CH <sub>3</sub> | 211 | Ag | 2.23  |
| H-CH <sub>3</sub> | 211 | Au | 1.83  |

|                     |     |    |       |
|---------------------|-----|----|-------|
| H-CH <sub>3</sub>   | 211 | Co | 0.86  |
| H-CH <sub>3</sub>   | 211 | Cu | 1.70  |
| H-CH <sub>3</sub>   | 211 | Ni | 1.13  |
| H-CH <sub>3</sub>   | 211 | Pd | 0.83  |
| H-CH <sub>3</sub>   | 211 | Pt | 0.73  |
| H-CH <sub>3</sub>   | 211 | Rh | 0.66  |
| H-CH <sub>3</sub>   | 211 | Ru | 0.52  |
| H-H                 | 211 | Au | 1.15  |
| H-H                 | 211 | Cu | 0.78  |
| H-H                 | 211 | Pd | 0.12  |
| H-H                 | 211 | Pt | 0.19  |
| H-OH                | 211 | Au | 1.82  |
| H-OH                | 211 | Cu | 0.80  |
| H-OH                | 211 | Ni | 0.35  |
| H-OH                | 211 | Pd | 0.82  |
| H-OH                | 211 | Pt | 0.72  |
| H-OH                | 211 | Rh | 0.49  |
| H-OH                | 211 | Ru | -0.01 |
| H <sub>2</sub> O    | 211 | Ag | -0.12 |
| H <sub>2</sub> O    | 211 | Co | -0.37 |
| H <sub>2</sub> O    | 211 | Cu | -0.18 |
| H <sub>2</sub> O    | 211 | Ni | -0.32 |
| H <sub>2</sub> O    | 211 | Pd | -0.18 |
| H <sub>2</sub> O    | 211 | Pt | -0.14 |
| H <sub>2</sub> O    | 211 | Rh | -0.29 |
| H <sub>2</sub> O    | 211 | Ru | -0.57 |
| HOH-CH              | 211 | Ag | 4.44  |
| HOH-CH              | 211 | Cu | 3.30  |
| HOH-CH              | 211 | Pd | 2.34  |
| HOH-CH              | 211 | Pt | 2.04  |
| HOH-CH              | 211 | Rh | 1.76  |
| HOH-CH <sub>2</sub> | 211 | Ag | 3.51  |
| HOH-CH <sub>2</sub> | 211 | Cu | 2.89  |
| HOH-CH <sub>2</sub> | 211 | Pd | 2.09  |
| HOH-CH <sub>2</sub> | 211 | Pt | 1.67  |
| HOH-CH <sub>2</sub> | 211 | Rh | 1.55  |
| HOH-CH <sub>3</sub> | 211 | Ag | 2.23  |
| HOH-CH <sub>3</sub> | 211 | Cu | 1.82  |
| HOH-CH <sub>3</sub> | 211 | Pd | 1.67  |
| HOH-CH <sub>3</sub> | 211 | Pt | 1.42  |
| HOH-CH <sub>3</sub> | 211 | Rh | 1.20  |
| O                   | 211 | Ag | 1.88  |

|       |     |    |       |
|-------|-----|----|-------|
| O     | 211 | Au | 2.60  |
| O     | 211 | Co | -0.15 |
| O     | 211 | Cu | 0.99  |
| O     | 211 | Ni | 0.13  |
| O     | 211 | Pd | 1.50  |
| O     | 211 | Pt | 1.26  |
| O     | 211 | Rh | 0.16  |
| O     | 211 | Ru | -0.10 |
| O-CO  | 211 | Ag | 5.10  |
| O-CO  | 211 | Au | 5.45  |
| O-CO  | 211 | Co | 2.73  |
| O-CO  | 211 | Cu | 3.92  |
| O-CO  | 211 | Ni | 2.77  |
| O-CO  | 211 | Pd | 3.99  |
| O-CO  | 211 | Pt | 3.53  |
| O-CO  | 211 | Rh | 2.56  |
| O-CO  | 211 | Ru | 2.35  |
| O-H   | 211 | Ag | 2.80  |
| O-H   | 211 | Au | 3.18  |
| O-H   | 211 | Cu | 1.63  |
| O-H   | 211 | Ni | 0.68  |
| O-H   | 211 | Pd | 1.75  |
| O-H   | 211 | Pt | 1.60  |
| O-H   | 211 | Rh | 0.73  |
| O-H   | 211 | Ru | 0.27  |
| O-HOH | 211 | Ag | 2.65  |
| O-HOH | 211 | Cu | 1.83  |
| O-HOH | 211 | Pd | 2.28  |
| O-HOH | 211 | Pt | 2.10  |
| O-HOH | 211 | Rh | 1.03  |
| OH    | 211 | Ag | 0.49  |
| OH    | 211 | Au | 0.94  |
| OH    | 211 | Cu | -0.04 |
| OH    | 211 | Ni | -0.50 |
| OH    | 211 | Pd | 0.34  |
| OH    | 211 | Pt | 0.36  |
| OH    | 211 | Rh | -0.37 |
| OH    | 211 | Ru | -0.69 |
| OH-CH | 211 | Ag | 4.97  |
| OH-CH | 211 | Cu | 3.43  |
| OH-CH | 211 | Pd | 2.78  |
| OH-CH | 211 | Pt | 2.47  |



|                    |     |    |      |
|--------------------|-----|----|------|
| OH-CH              | 211 | Rh | 1.69 |
| OH-CH <sub>2</sub> | 211 | Ag | 4.03 |
| OH-CH <sub>2</sub> | 211 | Cu | 3.01 |
| OH-CH <sub>2</sub> | 211 | Pd | 2.53 |
| OH-CH <sub>2</sub> | 211 | Pt | 2.10 |
| OH-CH <sub>2</sub> | 211 | Rh | 1.48 |
| OH-CH <sub>3</sub> | 211 | Ag | 2.76 |
| OH-CH <sub>3</sub> | 211 | Cu | 1.94 |
| OH-CH <sub>3</sub> | 211 | Pd | 2.11 |
| OH-CH <sub>3</sub> | 211 | Pt | 1.85 |
| OH-CH <sub>3</sub> | 211 | Rh | 1.13 |
| OH-OH              | 211 | Ag | 1.98 |
| OH-OH              | 211 | Cu | 1.07 |
| OH-OH              | 211 | Pd | 1.72 |
| OH-OH              | 211 | Pt | 1.76 |
| OH-OH              | 211 | Rh | 0.50 |

**Table SI-4** Computational details of the reference used for CatMAP data

| Reference | Article                                               | DFT Method | XC    | Potential | Slab Size                                                                                                      |
|-----------|-------------------------------------------------------|------------|-------|-----------|----------------------------------------------------------------------------------------------------------------|
| 1.        | <i>Energy Environ. Sci.</i> 3, 1311–1315 (2010)       | DACAPO     | RPBE  | USPP      | 3×2×3 and 3 x 3 x 3 depending upon the adsorbate size                                                          |
| 2.        | <i>Top Catal.</i> 57, 135–142 (2014)                  | DACAPO     | RPBE  | USPP      | 3 x 1 for (211)                                                                                                |
| 3.        | <i>Phy. Rev. Lett.</i> 99, 016105 (2007)              | DACAPO     | RPBE  | USPP      | 2 x 2 for 111<br>1 x 2 for 211                                                                                 |
| 4.        | <i>Phys. Chem. Chem. Phys.</i> 13, 20760–20765 (2011) | DACAPO     | RPBE  | USPP      | 2 x 2 for (111)<br>1 x 2, 2 x 2, and 2 x 3 for (211) surfaces depending on the size of the adsorbed molecules. |
| 5.        | <i>J. Phys. Chem. C</i> 113, 10548–10553 (2009)       | DACAPO     | RPBE  | USPP      | 2 x 2 for (111)<br>2 x 1 for (211)                                                                             |
| 6.        | <i>Angew. Chem. Int. Ed.</i> 47, 4835 – 4839 (2008)   | DACAPO     | RPBE  | USPP      | 2 x 2 for (111) surface                                                                                        |
| 7.        | <i>Catal. Lett.</i> 141, 370–373 (2011)               | DACAPO     | RPBE  | USPP      | 1 x 2 for (211)                                                                                                |
| 8.        | <i>J. Catal.</i> 293, 51–60 (2012)                    | DACAPO     | RPBE  | USPP      | 1 x 3 for (211)                                                                                                |
| 10.       | <i>J Catal.</i> 374, 161–                             | Quantum    | BEEF- | GBRV      | 3 x 2 for (111)                                                                                                |

|     |                                                         |          |      |      |                                                                                                                            |
|-----|---------------------------------------------------------|----------|------|------|----------------------------------------------------------------------------------------------------------------------------|
|     | 170 (2019).                                             | Espresso | vdW  |      |                                                                                                                            |
| 12. | <i>Top Catal</i> <b>57</b> , 80–88 (2014).              | DACAPO   | RPBE | USPP | 2 x 2 for (111)<br>2 x 1 for (211)                                                                                         |
| 13. | <i>J. Am. Chem. Soc.</i> <b>133</b> , 5009–5015 (2007). | VASP     | PW91 | USPP | The metal slab for (111) with appropriate size with the supercell size was fixed during the optimization of the C clusters |

## SI-6 References

- Peterson, A. A., Abild-pedersen, F., Studt, F., Rossmeisl, J. and Nørskov, J. K. *Energy Environ. Sci.* **3**, 1311–1315 (2010).
- Medford, A. J., Lausche, A. C., Abild-Pedersen, F., Temel, B., Schjødt, N. C., Nørskov, J. K. and Studt, F. *Top Catal.* **57**, 135–142 (2014).
- Gao, J., Yip, J., Zhao, J., Yakobson, B. I. and Ding, F. *J. Am. Chem. Soc.* **133**, 5009–5015 (2007).
- Abild-Pedersen, F., Greeley, J., Studt, F., Rossmeisl, J., Munter, T. R., Moses, P. G., Skúlason, E., Bligaard, T. and Nørskov, J. K. *Phys. Rev. Lett.* **99**, 016105 (2007).
- Wang, S., Petzold, V., Tripkovic, V., Kleis, J., Howalt, J. G., Skúlason, E., Fernández, E.M., Hvolbæk, B., Jones, G., Toftelund, A., Falsig, H., Björketun, M., Studt, F., Abild-Pedersen, F., Rossmeisl, J., Nørskov, J. K. and Bligaard, T. *Phys. Chem. Chem. Phys.* **13**, 20760–20765 (2011).
- Jiang, T., Mowbray, D. J., Dobrin, S., Falsig, H., Hvolbæk, B., Bligaard, T. and Nørskov, J. K. *J. Phys. Chem. C* **113**, 10548–10553 (2009).
- Falsig, H., Hvolbæk, B., Kristensen, I. S., Jiang, T., Christensen, C. H. and Nørskov, J. K. *Angew. Chem. Int. Ed.* **47**, 4835–4839 (2008).
- Wang, S., Temel, B., Shen, J., Jones, G., Grabow, L. C., Studt, F., Bligaard, T., Abild-Pedersen, F., Christensen, C. H. and Nørskov, J. K. *Catal. Lett.* **141**, 370–373 (2011).
- Falsig, H., Shen, J., Khan, T. S., Guo, W., Jones, G., Dahl, S. and Bligaard, *Top Catal* **57**, 80–88 (2014).
